# Supplementary material
Source: Springer Nature journal article supplement (https://www.springermedizin.de/resource/supplementary/12889_2009_1980_MOESM1_ESM.pdf/9486630)

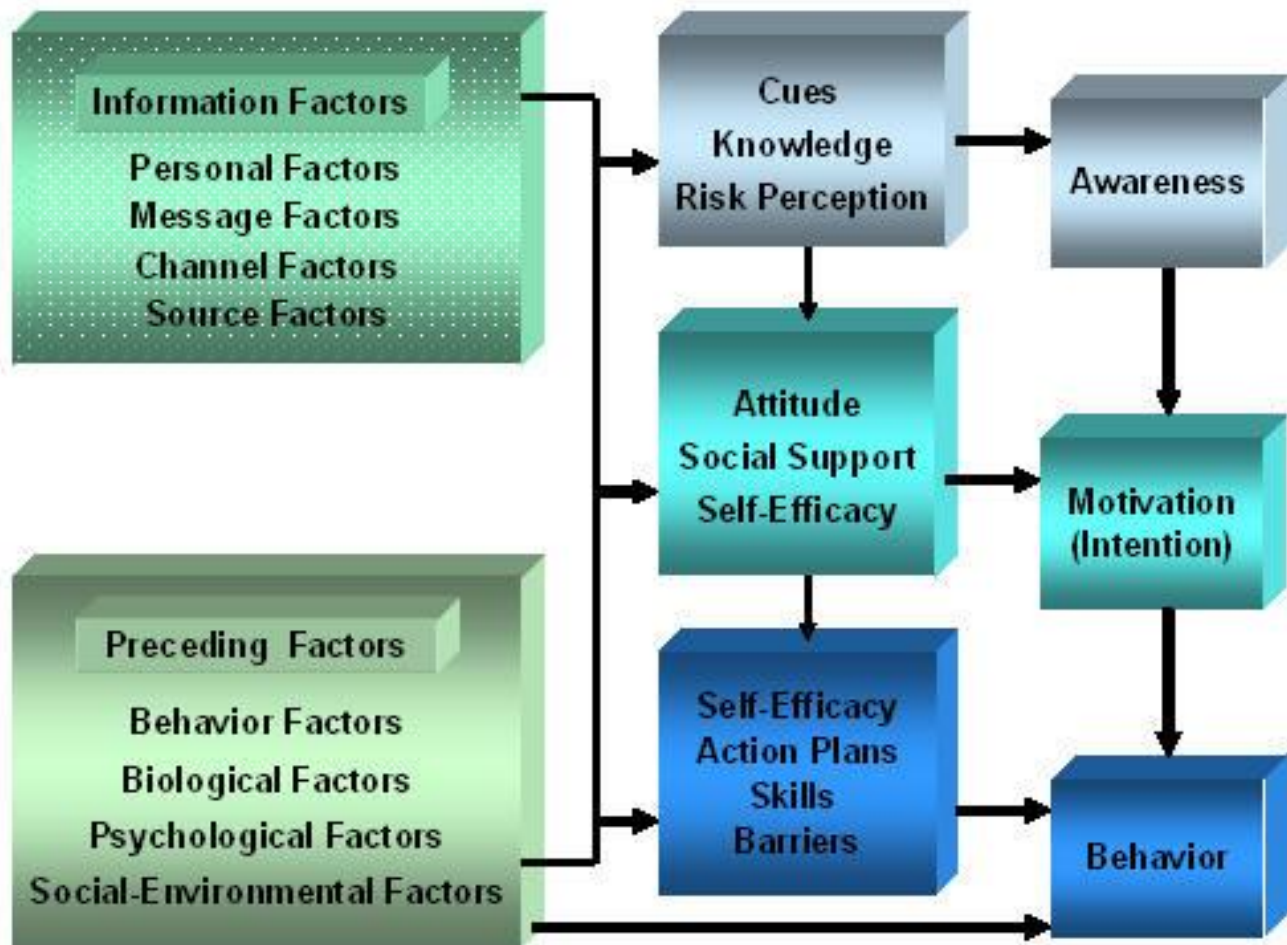

The I-Change Model 2.0 (De Vries 2008)

Supplement: MOESM1 [file 9486630]
